# Supplementary figures and images for: Development of novel anti-Kv 11.1 antibody-conjugated PEG–TiO2 nanoparticles for targeting pancreatic ductal adenocarcinoma cells
Source: PubMed Central journal article supplement (PMC3857862; doi:10.1007/s11051-013-2111-6), 2013-11-16

nPEG-TiO<sub>2</sub> in serum 37°C

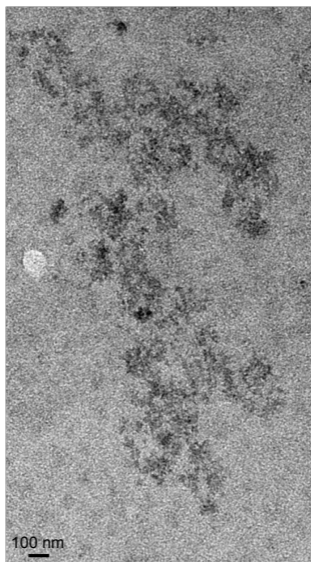

Supplement: 11051_2013_2111_MOESM1_ESM.pdf [file 11051_2013_2111_MOESM1_ESM.pdf]

Panc-1 treated with Kv11.1-PEG-TiO<sub>2</sub>

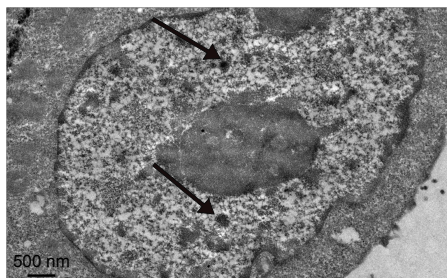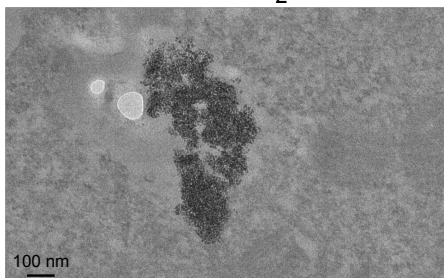

Panc-1 treated with nPEG-TiO<sub>2</sub>

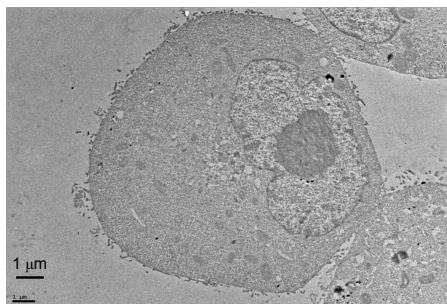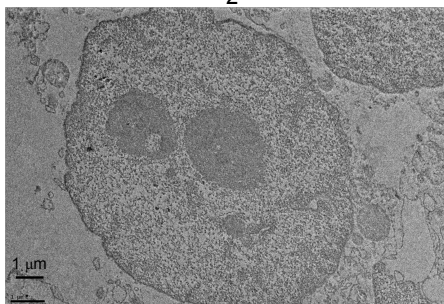

Supplement: 11051_2013_2111_MOESM2_ESM.pdf [file 11051_2013_2111_MOESM2_ESM.pdf]
